# Supplementary material for: Effects of CPAP and mandibular advancement device treatment in obstructive sleep apnea patients: a systematic review and meta-analysis
Source: Springer Nature journal article supplement (doi:10.1007/s11325-017-1590-6), 2017-11-11
Supplement: MOESM7 [file 15215942]

**ONLINE RESOURCE 7. Effect of CPAP and MAD in mean SF-36 mental health score and physical functioning.** There was no statistically significant difference in mean (a) mental health subscore (p = .238), nor (b) in mean physical functioning subscore (p = .824) between CPAP and MAD users.

(a)

(b)
