# Supplementary material for: Effects of CPAP and mandibular advancement device treatment in obstructive sleep apnea patients: a systematic review and meta-analysis
Source: Springer Nature journal article supplement (doi:10.1007/s11325-017-1590-6), 2017-11-11
Supplement: MOESM8 [file 15215942]

**ONLINE RESOURCE 8. Effect of CPAP and MAD in mean SF-36: (a) Mental Component summary, and (b) Physical component summary.** There was no statistically significant difference in the mean mental health component QoL (p =.994) nor the physical component summary (p = .827) between CPAP and MAD users.

(a)

(b)
