# Supplementary material for: Effects of CPAP and mandibular advancement device treatment in obstructive sleep apnea patients: a systematic review and meta-analysis
Source: Springer Nature journal article supplement (doi:10.1007/s11325-017-1590-6), 2017-11-11
Supplement: MOESM11 [file 15215942]

**ONLINE RESOURCE 11.** Comparison of drop-outs (due to the intervention) in CPAP and MAD treatment groups reported by the authors.
